# Supplementary material for: Assessment of prevalence and risk factors of helicobacter pylori infection in an oilfield Community in Hebei, China
Source: Springer Nature journal article supplement (doi:10.1186/s12876-019-1108-8), 2019-11-14
Supplement: MOESM1 [file 17388462]



## **DECLARATION**

**THE FOLLOWING IS THE ENGLISH VERSION OF THE QUESTIONNAIRE REFERRED IN THIS MANUSCRIPT. IT'S ONLY PART OF THE WHOLE QUESTIONNAIRE BECAUSE THE UNINVOLVED PART IS ASSOCIATED WITH OTHER PROJECTS. ANYWAY, THE CONTENT IS RELATIVELY COMPLETE IN TERMS OF THE DATA WE REFERRED IN THIS MANUSCRIPT.**

**IN THE EVENT OF INCONSISTENCY OR DISCREPANCY BETWEEN THE CHINESE VERSION AND THE ENGLISH VERSION, THE CHINESE LANGUAGE VERSION SHALL PREVAIL.**

**Corresponding author: Shutian Zhang**

**Signature: \_\_\_\_\_**



# Health follow-up form in Jidong Community

File number: \_\_\_\_\_

Health file number: \_\_\_\_\_

Name of the participant: \_\_\_\_\_

Department: \_\_\_\_\_

Date: \_\_\_\_\_

Name of the investigator: \_\_\_\_\_

Version of 2015

File number: \_\_\_\_\_

## Informed Consent

I have read and understood adequately the procedure, which the doctor and investigator involved in this study explained to me.

I hereby consent to undergo the examination. And I am willing to undertake the potential risk and detrimental results of the procedure.

DORTOR'S DECLARATION: I have fully explained the nature, risks and benefits of the study to the above patient/relative/guardian, and answered their questions. To the best of my knowledge, the patient/relative/guardian has been informed adequately and has consented. The medical staff will be responsible for the explanation of the examination results.

**IN THE EVENT OF INCONSISTENCY OR DISCREPANCY BETWEEN THE CHINESE VERSION AND THE ENGLISH VERSION, THE CHINESE LANGUAGE VERSION SHALL PREVAIL.**

Participant:

signature: \_\_\_\_\_ or relative/guardian signature: \_\_\_\_\_ Relationship: \_\_\_\_\_

Doctor signature: \_\_\_\_\_ Institution: \_\_\_\_\_

Investigator signature: \_\_\_\_\_ Institution: \_\_\_\_\_

File number: \_\_\_\_\_

### Part one: Basic Information

A1. Name: \_\_\_\_\_ A2. Gender: \_\_\_\_\_ A3. Neck Circumference: \_\_\_\_\_ cm

A4. Phone (Mobile): \_\_\_\_\_

A5. Phone (immobile): \_\_\_\_\_

A6. ID Number: \_\_\_\_\_

A7. Address : \_\_\_\_\_ Province \_\_\_\_\_ City \_\_\_\_\_ County \_\_\_\_\_ Village

A8. Household area per capita (sq.m) : <30 \_\_\_\_\_ 30-60 \_\_\_\_\_ >60 \_\_\_\_\_

A9. Household Population: 1 \_\_\_\_\_ 2-4 \_\_\_\_\_  $\geq$ 5 \_\_\_\_\_

A10. Surrounding Environment: Good \_\_\_\_\_ Intermediate \_\_\_\_\_ Bad \_\_\_\_\_

A11. Household Hygiene: Good \_\_\_\_\_ Intermediate \_\_\_\_\_ Bad \_\_\_\_\_

A12. Education Level: Primary School \_\_\_\_\_ Middle or high school: \_\_\_\_\_ University or  
above: \_\_\_\_\_

A13. Marriage Status: Single: \_\_\_\_\_ Married: \_\_\_\_\_ Divorced: \_\_\_\_\_ Other: \_\_\_\_\_

File number: \_\_\_\_\_

## Part two: Disease Information

### 1. History of Cardiovascular diseases

\_\_\_\_\_ Atrial Flutter/Atrial Fibrillation Date: \_\_\_\_\_ Hospital: \_\_\_\_\_

\_\_\_\_\_ Heart Failure Date: \_\_\_\_\_ Hospital: \_\_\_\_\_

\_\_\_\_\_ Myocardial Infarction Date: \_\_\_\_\_ Hospital: \_\_\_\_\_

\_\_\_\_\_ Coronary Heart Disease Date: \_\_\_\_\_ Hospital: \_\_\_\_\_

\_\_\_\_\_ Peripheral Artery Atherosclerosis Date: \_\_\_\_\_ Hospital: \_\_\_\_\_

\_\_\_\_\_ Coronary Stent Implantation Date: \_\_\_\_\_ Hospital: \_\_\_\_\_

### 2. History of Cerebrovascular diseases

\_\_\_\_\_ Ischemic Stroke Date: \_\_\_\_\_ Hospital: \_\_\_\_\_

\_\_\_\_\_ Cerebral Hemorrhage Date: \_\_\_\_\_ Hospital: \_\_\_\_\_

\_\_\_\_\_ Subarachnoid Hemorrhage Date: \_\_\_\_\_ Hospital: \_\_\_\_\_

\_\_\_\_\_ Transient Ischemic Attack Date: \_\_\_\_\_ Hospital: \_\_\_\_\_

\_\_\_\_\_ Others Date: \_\_\_\_\_ Hospital: \_\_\_\_\_

### 3. History of Cancer

\_\_\_\_\_ Breast Cancer Date: \_\_\_\_\_ Hospital: \_\_\_\_\_

\_\_\_\_\_ Lung Cancer Date: \_\_\_\_\_ Hospital: \_\_\_\_\_

File number: \_\_\_\_\_

\_\_\_\_\_ Gastric Cancer Date: \_\_\_\_\_ Hospital: \_\_\_\_\_

\_\_\_\_\_ Colorectal Cancer Date: \_\_\_\_\_ Hospital: \_\_\_\_\_

\_\_\_\_\_ Pancreatic Cancer Date: \_\_\_\_\_ Hospital: \_\_\_\_\_

\_\_\_\_\_ Renal Cancer Date: \_\_\_\_\_ Hospital: \_\_\_\_\_

\_\_\_\_\_ Ureter Cancer Date: \_\_\_\_\_ Hospital: \_\_\_\_\_

\_\_\_\_\_ Bladder Cancer Date: \_\_\_\_\_ Hospital: \_\_\_\_\_

\_\_\_\_\_ Prostatic Cancer Date: \_\_\_\_\_ Hospital: \_\_\_\_\_

\_\_\_\_\_ Thyroid Cancer Date: \_\_\_\_\_ Hospital: \_\_\_\_\_

\_\_\_\_\_ Lymphoma Date: \_\_\_\_\_ Hospital: \_\_\_\_\_

\_\_\_\_\_ Leukemia Date: \_\_\_\_\_ Hospital: \_\_\_\_\_

\_\_\_\_\_ Cervical Cancer Date: \_\_\_\_\_ Hospital: \_\_\_\_\_

\_\_\_\_\_ Endometrial Cancer Date: \_\_\_\_\_ Hospital: \_\_\_\_\_

\_\_\_\_\_ Others Date: \_\_\_\_\_ Hospital: \_\_\_\_\_

## Part two: Personal Habits

### 1. History of smoking

1.1 Smoking Yes. \_\_\_\_\_ No. \_\_\_\_\_

1.2 Amount of smoking per day 1-10 \_\_\_\_\_ 11-20 \_\_\_\_\_ 21-30 \_\_\_\_\_ 31-40 \_\_\_\_\_

41-50 \_\_\_\_\_ 51-60 \_\_\_\_\_ >60 \_\_\_\_\_

File number: \_\_\_\_\_

1.3 Passive smoking

1.3.1 Years of Passive Smoking \_\_\_\_\_ year

2. History of alcohol drinking

2.1 Alcohol drinking Yes. \_\_\_\_\_ No. \_\_\_\_\_

2.2 The amount of alcohol consuming per day \_\_\_\_\_

3. Personal habits

3.1 Raw vegetable Never \_\_\_\_\_ Often \_\_\_\_\_ Everyday \_\_\_\_\_

3.2 Fried food Never \_\_\_\_\_ Often \_\_\_\_\_ Everyday \_\_\_\_\_

3.3 Spicy food Never \_\_\_\_\_ Often \_\_\_\_\_ Everyday \_\_\_\_\_

3.4 Pickled food Never \_\_\_\_\_ Often \_\_\_\_\_ Everyday \_\_\_\_\_

3.5 Bacon Never \_\_\_\_\_ Often \_\_\_\_\_ Everyday \_\_\_\_\_

3.6 Raw Garlic Never \_\_\_\_\_ Often \_\_\_\_\_ Everyday \_\_\_\_\_

3.7 Drinking unboiled water Never \_\_\_\_\_ Often \_\_\_\_\_ Everyday \_\_\_\_\_

3.8 Hand washing Never \_\_\_\_\_ Often \_\_\_\_\_ Everyday \_\_\_\_\_

3.9 Stay up Never \_\_\_\_\_ Often \_\_\_\_\_ Everyday \_\_\_\_\_

3.10 Washing fruit Never \_\_\_\_\_ Often \_\_\_\_\_ Everyday \_\_\_\_\_

3.11 Peeling fruit Never \_\_\_\_\_ Often \_\_\_\_\_ Everyday \_\_\_\_\_

3.12 Source of drinking water Piped water \_\_\_\_\_ barreled water \_\_\_\_\_

4. Family Habits

File number: \_\_\_\_\_

4.1 Raising domestic animals Never \_\_\_\_\_ Often \_\_\_\_\_ Everyday \_\_\_\_\_

4.2 Shared tableware Never \_\_\_\_\_ Often \_\_\_\_\_ Everyday \_\_\_\_\_

4.3 Shared cups Never \_\_\_\_\_ Often \_\_\_\_\_ Everyday \_\_\_\_\_

4.4 Shared tooth-brushing cups Never \_\_\_\_\_ Often \_\_\_\_\_ Everyday \_\_\_\_\_

4.5 Washing tableware with cleaner Never \_\_\_\_\_ Often \_\_\_\_\_ Everyday \_\_\_\_\_

4.6 Eating by individual serving Never \_\_\_\_\_ Often \_\_\_\_\_ Everyday \_\_\_\_\_

5. Digestive disease

5.1 Chronic gastritis No \_\_\_\_\_ Once \_\_\_\_\_ Yes \_\_\_\_\_

5.2 Gastric ulcer No \_\_\_\_\_ Once \_\_\_\_\_ Yes \_\_\_\_\_

5.3 Duodenal ulcer No \_\_\_\_\_ Once \_\_\_\_\_ Yes \_\_\_\_\_

5.4 Cholelithiasis No \_\_\_\_\_ Once \_\_\_\_\_ Yes \_\_\_\_\_

5.5 Family history of gastrointestinal cancer No \_\_\_\_\_ Once \_\_\_\_\_ Yes \_\_\_\_\_

5.6 Gastric disease of spouse No \_\_\_\_\_ Once \_\_\_\_\_ Yes \_\_\_\_\_

5.7 History of gastrointestinal endoscopy No \_\_\_\_\_ Once \_\_\_\_\_ Yes \_\_\_\_\_

5.8 Other digestive diseases \_\_\_\_\_

6. Other diseases

6.1 Pulmonary diseases No \_\_\_\_\_ Once \_\_\_\_\_ Yes \_\_\_\_\_

Name of disease \_\_\_\_\_

6.2 Autoimmune diseases. No \_\_\_\_\_ Once \_\_\_\_\_ Yes \_\_\_\_\_



File number: \_\_\_\_\_

Name of disease \_\_\_\_\_

6.3 Interval from antibiotics use to Hp detection <1 week \_\_\_\_\_ 1-2 weeks \_\_\_\_\_

2-4 weeks \_\_\_\_\_ >4 weeks \_\_\_\_\_

6.4 Interval from NSAIDs use to Hp detection <1 week \_\_\_\_\_ 2-3 weeks \_\_\_\_\_ 4

weeks-3 months \_\_\_\_\_ >3 months \_\_\_\_\_

#### 7. Knowledge about Hp

7.1 Purpose of <sup>13</sup>C-UBT Unclear \_\_\_\_\_ intermediate \_\_\_\_\_ clear \_\_\_\_\_

7.2 What is Hp Unclear \_\_\_\_\_ intermediate \_\_\_\_\_ clear \_\_\_\_\_

7.3 Route of transmission Unclear \_\_\_\_\_ intermediate \_\_\_\_\_ clear \_\_\_\_\_

7.4 Hp-related diseases Unclear \_\_\_\_\_ intermediate \_\_\_\_\_ clear \_\_\_\_\_

7.5 Interval of reexamination Unclear \_\_\_\_\_ intermediate \_\_\_\_\_ clear \_\_\_\_\_

7.6 History of Hp detection Unclear \_\_\_\_\_ intermediate \_\_\_\_\_ clear \_\_\_\_\_

7.7 Hp infection in family Unclear \_\_\_\_\_ intermediate \_\_\_\_\_ clear \_\_\_\_\_

---

中石油冀东油田员工  
健康随访表

档案编号

|  |  |  |  |  |  |  |  |
|--|--|--|--|--|--|--|--|
|  |  |  |  |  |  |  |  |
|--|--|--|--|--|--|--|--|

体检编号

|  |  |  |  |  |  |  |  |  |  |
|--|--|--|--|--|--|--|--|--|--|
|  |  |  |  |  |  |  |  |  |  |
|--|--|--|--|--|--|--|--|--|--|

体检人姓名

体检人单位

体检日期

|  |  |  |  |  |   |  |  |   |  |  |   |
|--|--|--|--|--|---|--|--|---|--|--|---|
|  |  |  |  |  | 年 |  |  | 月 |  |  | 日 |
|--|--|--|--|--|---|--|--|---|--|--|---|

调查者姓名

|  |  |
|--|--|
|  |  |
|--|--|

---

冀东油田卫生服务中心编印  
2015

填写说明

1. 填写记录请使用蓝黑色钢笔或签字笔清楚填写。
2. 体检表填写务必准确、清晰，不得随意涂改，错误之处纠正时需用红色钢笔或签字笔在错误处居中划一道横线，并签署修改者姓名及修改时间，原改处应能清晰可见。不要掩盖填入的原始数据，不要用橡皮擦、用改正液遮盖或划许多道线。
3. 举例：~~3.24~~ 8.2 李某某 07/04/28
4. 根据职工本人的具体情况，按要求填写登记表的每一项。在“□”内划“×”表示选择此项。在“\_\_\_\_\_”内填写有关的文字说明，要求字迹工整，应用规范的医学术语，不得应用简写或英文缩写。
5. 缺失或不可得的信息，请在相应的横线上填写“NA”。
6. 所有表格上的日期都以“年/月/日”的形式表示，包括职工本人的出生日期。如果不知道具体日期，请用“NA”表示，以“年/月/NA”的形式填入日期，请尽可能填入完整的阳历日期。所有时间均采用24小时计时制，如下午5点应填写为“17:00”。

档案编号

## 知情同意书

**背景：**我们邀请您参加中石油冀东油田员工健康随访研究。本研究旨在了解冀东油田职工的健康状况及疾病的患病情况，并随访员工心脑血管等系统疾病的发生和发展，以期制定相应的积极、有效地预防和治疗措施，提高员工的健康水平和生活质量。

**操作步骤：**若您同意参与此项研究，您需协助医生完成调查表中所需填写项目，内容涉及您的基本信息、生活状况及疾病情况（包括发病时间、诊治情况等），您还需要留下可靠的联系方式（包括电话和住址），以便医生及时将您的健康信息反馈给您及进行随访。

**获益：**您可以全面了解您的健康情况，并获得疾病的预防信息。

**风险：**参与该项研究您不会有任何风险。

**保密性：**所有信息均保密，您的姓名、电话和联系方式及其他基本信息不会泄漏给其他非研究人员和组织。

**自愿性：**您参加本研究完全出于自愿，拒绝参加将不会影响您本次的体检。

### 知情同意声明

我已经阅读了上述信息，所有的研究规程均已解释清楚，我已经完全理解。同时我获得了讨论和问问题的机会并且所有问题都已获得了满意的答复。

因此，我同意参加此项研究。

体检者或家属签字：\_\_\_\_\_

日期：     年   月   日

档案编号

第一部分 基本信息

A1、姓名：\_\_\_\_\_ A2、性别： 男  女 A3、颈围：  cm

A4、联系电话（移动）：

A5、联系电话（固定）： -

A6、身份证号：

A7、家庭住址：\_\_\_\_\_省 \_\_\_\_\_市 \_\_\_\_\_县（区） \_\_\_\_\_乡（镇）

A8、人均住房面积（平方米）：  
小于等于 30     30 到 60     大于等于 60

A9、家庭常驻人口数（人）：  
1 人     2-4 人     大于等于 5 人

A10、家庭周围环境：  
好     较好     差

A11、家庭卫生条件：  
       

A5、您的文化程度：  
未接受过正规学校教育     小学未毕业     小学     初中     高中/中专/技校     大专     本科     研究生及以上

A6、您目前的婚姻状态：  
未婚     已婚     离婚     分居     丧偶     其他

第二部分 个人健康信息

1. 高血压病史

1.1 自上次体检（2013 年到 2014 年）至今，是否被医生诊断为高血压：  
 是  否  → 跳转到 2

1.2 既往血压最高：  
 $140/90\text{mmHg}$  至  $160/100\text{mmHg}$       $160/100\text{mmHg}$  至  $180/110\text{mmHg}$      大于  $180/110\text{mmHg}$

1.3 首次诊断时间：年 月 日

1.4 目前是否使用降压药：  
 是  否

档案编号

- 1.5 目前正在服用的药物 (多选):  利尿剂   $\beta$  受体阻滞剂  钙拮抗剂  血管紧张素转换酶抑制剂  血管紧张素 II 受体拮抗剂
- 叶酸制剂   $\alpha$  受体阻滞剂  复合制剂  中药制剂及其他

## 2. 糖尿病史

2.1 自上次体检 (2013 年到 2014 年) 至今, 是否被医生诊断为糖尿病:  是  否  $\rightarrow$  跳转到 3

2.2 首次诊断时间:  年  月  日

2.3 糖尿病类型:  I 型  II 型  不详

2.4 目前是否使用降糖药:  是  否

2.5 目前正在使用的药物 (多选):  磺脲类  双胍类  葡萄糖苷酶抑制剂  噻唑烷二酮类  非胰岛素促分泌剂  胰岛素制剂  中药制剂及其他

## 3. 高脂血症病史

3.1 自上次体检 (2013 年到 2014 年) 至今, 是否被医生诊断为高脂血症:  是  否  $\rightarrow$  跳转到 4

3.2 首次诊断时间:  年  月  日

3.3 目前是否使用降脂药:  是  否

3.4 调脂药物种类 (多选):  他汀类  贝特类  胆酸螯合树脂类  烟酸及其衍生物  中药制剂及其他

3.5 服用降脂药过程中是否有不良反应:  是  否  $\rightarrow$  跳转到 4

3.6 不良反应种类 (多选):  肌肉酸痛  肝功能异常  腹胀、恶心等消化道不适  其他

## 4. 心血管病史

4.1 自上次体检 (2013 年到 2014 年) 至今, 是否被医生诊断为心血管疾病 (首次):  是  否  $\rightarrow$  跳转到 5

档案编号

请选择类型 ( 多选 ) :

诊断时间

诊断医院

房颤 / 房扑

年 月 日

\_\_\_\_\_

心力衰竭

年 月 日

\_\_\_\_\_

心肌梗死

年 月 日

\_\_\_\_\_

冠心病

年 月 日

\_\_\_\_\_

外周动脉粥样硬化

年 月 日

\_\_\_\_\_

手术时间

手术医院

心脏置入支架

年 月 日

\_\_\_\_\_

## 5. 脑血管病史

5.1 自上次体检 (2013 年到 2014 年) 至今, 是否  
被医生诊断为脑血管疾病 (首次):

是

否

→ 跳转到 6

请选择类型 ( 多选 ) :

诊断时间

诊断医院

缺血性卒中

年 月 日

\_\_\_\_\_

脑出血

年 月 日

\_\_\_\_\_

蛛网膜下腔出血

年 月 日

\_\_\_\_\_

短暂性脑缺血发作

年 月 日

\_\_\_\_\_

其他

年 月 日

\_\_\_\_\_

## 6. 肿瘤病史

6.1 自上次体检 (2013 年到 2014 年) 至今, 是否被医生诊断为肿瘤 (首次):

是

否

请选择类型 ( 多选 ) :

诊断时间

诊断医院

乳腺癌

年 月 日

\_\_\_\_\_

肺癌

年 月 日

\_\_\_\_\_

胃癌

年 月 日

\_\_\_\_\_

肠癌

年 月 日

\_\_\_\_\_

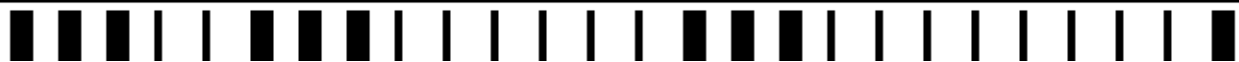

档案编号

诊断时间

诊断医院

|                                  |                      |   |                      |   |                      |   |       |
|----------------------------------|----------------------|---|----------------------|---|----------------------|---|-------|
| <input type="checkbox"/> 胰腺癌     | <input type="text"/> | 年 | <input type="text"/> | 月 | <input type="text"/> | 日 | _____ |
| <input type="checkbox"/> 肾癌      | <input type="text"/> | 年 | <input type="text"/> | 月 | <input type="text"/> | 日 | _____ |
| <input type="checkbox"/> 肾盂或输尿管癌 | <input type="text"/> | 年 | <input type="text"/> | 月 | <input type="text"/> | 日 | _____ |
| <input type="checkbox"/> 膀胱癌     | <input type="text"/> | 年 | <input type="text"/> | 月 | <input type="text"/> | 日 | _____ |
| <input type="checkbox"/> 前列腺癌    | <input type="text"/> | 年 | <input type="text"/> | 月 | <input type="text"/> | 日 | _____ |
| <input type="checkbox"/> 甲状腺癌    | <input type="text"/> | 年 | <input type="text"/> | 月 | <input type="text"/> | 日 | _____ |
| <input type="checkbox"/> 淋巴瘤     | <input type="text"/> | 年 | <input type="text"/> | 月 | <input type="text"/> | 日 | _____ |
| <input type="checkbox"/> 白血病     | <input type="text"/> | 年 | <input type="text"/> | 月 | <input type="text"/> | 日 | _____ |
| <input type="checkbox"/> 宫颈癌     | <input type="text"/> | 年 | <input type="text"/> | 月 | <input type="text"/> | 日 | _____ |
| <input type="checkbox"/> 子宫内膜癌   | <input type="text"/> | 年 | <input type="text"/> | 月 | <input type="text"/> | 日 | _____ |
| <input type="checkbox"/> 其他      | <input type="text"/> | 年 | <input type="text"/> | 月 | <input type="text"/> | 日 | _____ |

**第三部分 饮食、生活习惯**

**1. 吸烟史**

1.1 是否吸烟：  
 现在吸       从不吸       曾经吸，  
 现已戒烟 12 个月       曾经吸，  
 现已戒烟 <12 个月

1.2 (若现在吸烟) 每日平均吸烟支数：  
 1-10 支      11-20 支      21-30 支      31-40 支      41-50 支      51-60 支      61 支及以上  
                                   

1.3 是否被动吸烟(家庭或工作环境中经常有人吸烟)：  
 有       无

1.3.1 如有，被动吸烟的年限  年

**2. 饮酒史**

2.1 饮酒频率：  
 不饮酒       <1 个标准  
 饮酒量/日       <2 个标准  
 饮酒量/日       2-4 个标准  
 饮酒量/日       ≥ 5 个标准  
 饮酒量/日       饮酒  
 但剂量不详       已戒烟       不详

(1 个标准饮酒量相当于 120ml [2.5 两] 葡萄酒、360ml [1 听] 啤酒或 45ml [1 两左右] 白酒)



档案编号

3. 个人生活习惯

- |                 | 无或偶然                            | 经常                             | 每天                               |
|-----------------|---------------------------------|--------------------------------|----------------------------------|
| 3.1 生食蔬菜：       | <input type="checkbox"/>        | <input type="checkbox"/>       | <input type="checkbox"/>         |
| 3.2 进食油炸食品：     | <input type="checkbox"/>        | <input type="checkbox"/>       | <input type="checkbox"/>         |
| 3.3 进食辛辣食品：     | <input type="checkbox"/>        | <input type="checkbox"/>       | <input type="checkbox"/>         |
| 3.4 进食腌制食品：     | <input type="checkbox"/>        | <input type="checkbox"/>       | <input type="checkbox"/>         |
| 3.5 进食熏肉、腊肉等：   | <input type="checkbox"/>        | <input type="checkbox"/>       | <input type="checkbox"/>         |
| 3.6 进食生大蒜：      | <input type="checkbox"/>        | <input type="checkbox"/>       | <input type="checkbox"/>         |
| 3.7 饮生水（未煮开的水）： | <input type="checkbox"/>        | <input type="checkbox"/>       | <input type="checkbox"/>         |
| 3.8 饭前便后洗手：     | <input type="checkbox"/>        | <input type="checkbox"/>       | <input type="checkbox"/>         |
| 3.9 熬夜：         | <input type="checkbox"/>        | <input type="checkbox"/>       | <input type="checkbox"/>         |
| 3.10 蔬菜水果清洗：    | <input type="checkbox"/>        | <input type="checkbox"/>       | <input type="checkbox"/>         |
| 3.11 水果是否削皮：    | <input type="checkbox"/>        | <input type="checkbox"/>       | <input type="checkbox"/>         |
| 3.12 经常饮用水源：    | <input type="checkbox"/> （水龙头水） | <input type="checkbox"/> （桶装水） | <input type="checkbox"/> （市售瓶装水） |

4. 家庭生活习惯

- |            | 有                        | 无                        |                          |                          |  |  |
|------------|--------------------------|--------------------------|--------------------------|--------------------------|--|--|
| 4.1 室内养动物： | <input type="checkbox"/> | <input type="checkbox"/> |                          |                          |  |  |
|            | 无或偶然                     | 经常                       | 每天                       |                          |  |  |
| 4.2 共用餐具：  | <input type="checkbox"/> | <input type="checkbox"/> | <input type="checkbox"/> |                          |  |  |
| 4.3 共用水杯：  | <input type="checkbox"/> | <input type="checkbox"/> | <input type="checkbox"/> |                          |  |  |
| 4.4 共用刷牙杯： | <input type="checkbox"/> | <input type="checkbox"/> | <input type="checkbox"/> |                          |  |  |
| 4.5 碗筷清洗：  | 用洗洁精                     | 多半用洗洁精                   | 较少用洗洁精                   | 从不用洗洁精                   |  |  |
|            | <input type="checkbox"/> | <input type="checkbox"/> | <input type="checkbox"/> | <input type="checkbox"/> |  |  |
| 4.6 分餐或公筷： | 无或偶然                     | 有时                       | 经常                       | 每天                       |  |  |
|            | <input type="checkbox"/> | <input type="checkbox"/> | <input type="checkbox"/> | <input type="checkbox"/> |  |  |

5. 消化道疾病

- |               | 无                        | 曾有                       | 现有                       |
|---------------|--------------------------|--------------------------|--------------------------|
| 5.1 慢性胃炎病史：   | <input type="checkbox"/> | <input type="checkbox"/> | <input type="checkbox"/> |
| 5.2 胃溃疡病史：    | <input type="checkbox"/> | <input type="checkbox"/> | <input type="checkbox"/> |
| 5.3 十二指肠溃疡病史： | <input type="checkbox"/> | <input type="checkbox"/> | <input type="checkbox"/> |

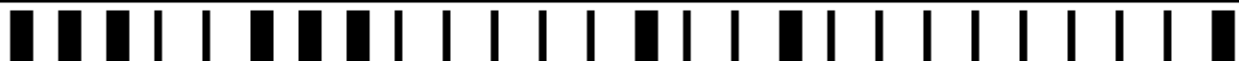

档案编号

5.4 慢性胆囊炎胆结石病史  无  曾有  现有  
取石或手术  否  是

5.5 胃肠道肿瘤家族史  无  曾有  现有  
手术干预  否  是

5.6 配偶胃病史  无  曾有  现有

5.7 胃镜检查史  无  曾有  现有 次数:

5.8 其他消化道病史(如肝硬化):  无  曾有  现有 疾病名称: \_\_\_\_\_

6. 其他疾病

6.1 呼吸道病史(如肺结核、支气管扩张、慢阻肺)

无  曾有  现有 疾病名称: \_\_\_\_\_

6.2 自身免疫疾病史  无  有 (如有, 以下多选)

痛风  类风湿性关节炎  其他关节炎  系统性红斑狼  过敏性紫癜  银屑病(或牛皮癣)  强直性脊柱炎

6.3 服用抗生素时限(距 HP 检测时间):  少于1周  1-2周  2-4周  4周及以上

6.4 服用非甾体抗炎药时限(距 HP 检测时间)  
(阿司匹林、吲哚美辛、扑热息痛、布洛芬、贝诺酯、芬必得、吡罗昔康等)

少于1周  2-3周  4周-3月  3月及以上

7. 幽门螺杆菌(HP)知晓状况

7.1 这次吹气检测的目的  不了解  略有了解  了解  
7.2 HP 是什么  不了解  略有了解  了解  
7.3 HP 的传播途径  不了解  略有了解  了解  
7.4 HP 与哪些疾病相关  不了解  略有了解  了解  
7.5 HP 感染的治疗用药  不了解  略有了解  了解

档案编号

- 7.6 HP 感染的复查时间  不了解  略有了解  了解
- 7.7 自己及家人是否检测过  无  单人单次  单人多次 最高次数：
- 7.8 家族中是否存在 HP 感染  否  是  不详

8 药物使用情况（您用过或正在使用以下哪些药物？若平均每月不到 1 次不用填写）（多选）

| 药物   | 是 否                                               | 开始使用时间                                                                                                                            | 平均使用天数                   |                          |                          |                          |
|------|---------------------------------------------------|-----------------------------------------------------------------------------------------------------------------------------------|--------------------------|--------------------------|--------------------------|--------------------------|
|      |                                                   |                                                                                                                                   | 每月 1-3 天                 | 每周 1-2 天                 | 每周 3-4 天                 | 每周 5-7 天                 |
| 阿司匹林 | <input type="checkbox"/> <input type="checkbox"/> | <input type="text"/> <input type="text"/> <input type="text"/> <input type="text"/> 年 <input type="text"/> <input type="text"/> 月 | <input type="checkbox"/> | <input type="checkbox"/> | <input type="checkbox"/> | <input type="checkbox"/> |
| 止痛药  | <input type="checkbox"/> <input type="checkbox"/> | <input type="text"/> <input type="text"/> <input type="text"/> <input type="text"/> 年 <input type="text"/> <input type="text"/> 月 | <input type="checkbox"/> | <input type="checkbox"/> | <input type="checkbox"/> | <input type="checkbox"/> |
| 他汀类  | <input type="checkbox"/> <input type="checkbox"/> | <input type="text"/> <input type="text"/> <input type="text"/> <input type="text"/> 年 <input type="text"/> <input type="text"/> 月 | <input type="checkbox"/> | <input type="checkbox"/> | <input type="checkbox"/> | <input type="checkbox"/> |
| 中药   | <input type="checkbox"/> <input type="checkbox"/> | <input type="text"/> <input type="text"/> <input type="text"/> <input type="text"/> 年 <input type="text"/> <input type="text"/> 月 | <input type="checkbox"/> | <input type="checkbox"/> | <input type="checkbox"/> | <input type="checkbox"/> |

9. 睡眠状况

9.1 在过去的 2 年里，您是否使用药物改善睡眠（如安眠药等）：

- 从未使用  每月 <1 次  每月 1-3 次  每周 1 次  每周 2-6 次  每天

9.2 睡眠打鼾么？ 从不  每周 <1 次  每周 1-5 次  几乎每天  不知道

9.3 鼾声比平时说话声还响或关着门也能听到吗？ 否  是  不知道

9.4 有人说你睡觉时有呼吸暂停吗？ (>10 秒) 否  是  不知道

9.5 是否曾经被告知自己在做噩梦的时候，会随着梦境动手脚？

- 否  是，但只有 1-2 次  是，至少三次以上

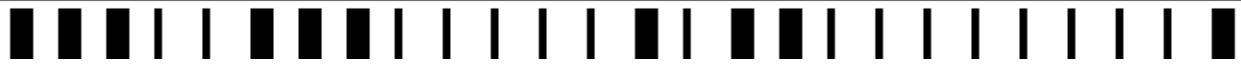

档案编号

第四部分 请问你的头型最接近以下哪个

男性

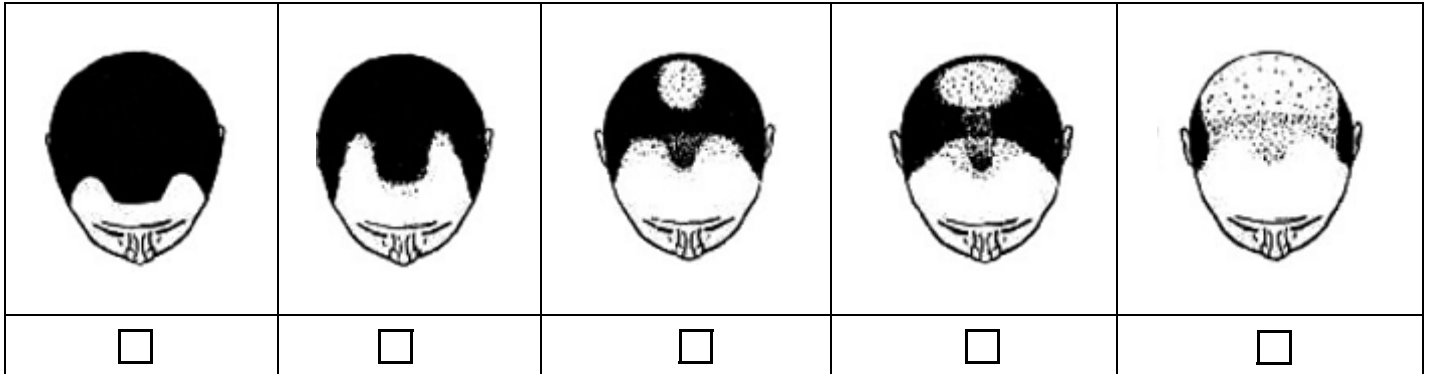

女性

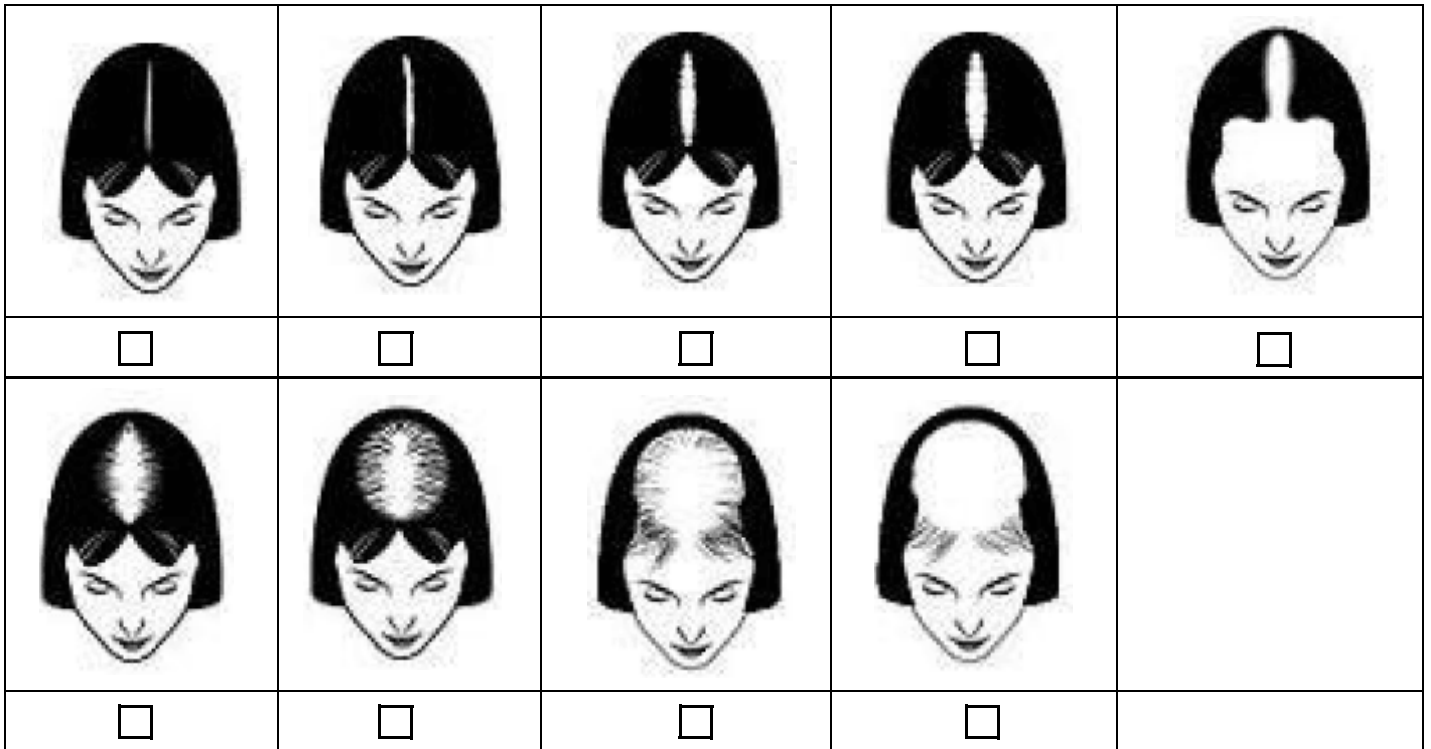

第五部分 亚健康状况调查问卷

请您就最近三个月的情况，回答下列问题

B1 您觉得疲劳吗（在运动量没有明显增加的情况下）？

完全没有       很少有       有       多数有       几乎总是

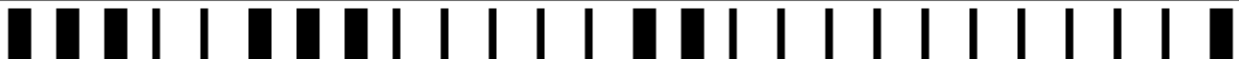

档案编号

B2 您的疲劳在休息后能缓解吗？

完全缓解     明显缓解     有所缓解     略有缓解     几乎不能缓解

B3 在工作时您有困倦或倦怠的现象吗

完全没有     很少有     有     多数有     几乎总是

B4-B24 对于下表中所列的问题，在过去的三个月内，这些症状在您身上发生的频率是怎样的？  
 最大部分时候有、有时候有、很少或是从来没有？（每行单选）

| 症状                | 完全没有                     | 很少有                      | 有                        | 多数有                      | 几乎总是                     |
|-------------------|--------------------------|--------------------------|--------------------------|--------------------------|--------------------------|
| B4 感觉头痛           | <input type="checkbox"/> | <input type="checkbox"/> | <input type="checkbox"/> | <input type="checkbox"/> | <input type="checkbox"/> |
| B5 感觉头晕           | <input type="checkbox"/> | <input type="checkbox"/> | <input type="checkbox"/> | <input type="checkbox"/> | <input type="checkbox"/> |
| B6 眼睛酸胀           | <input type="checkbox"/> | <input type="checkbox"/> | <input type="checkbox"/> | <input type="checkbox"/> | <input type="checkbox"/> |
| B7 咽喉疼痛           | <input type="checkbox"/> | <input type="checkbox"/> | <input type="checkbox"/> | <input type="checkbox"/> | <input type="checkbox"/> |
| B8 肌肉和关节经常感到发僵或僵硬 | <input type="checkbox"/> | <input type="checkbox"/> | <input type="checkbox"/> | <input type="checkbox"/> | <input type="checkbox"/> |
| B9 肩、颈或腰部酸痛       | <input type="checkbox"/> | <input type="checkbox"/> | <input type="checkbox"/> | <input type="checkbox"/> | <input type="checkbox"/> |
| B10 走路时感到双腿沉重     | <input type="checkbox"/> | <input type="checkbox"/> | <input type="checkbox"/> | <input type="checkbox"/> | <input type="checkbox"/> |
| B11 静息时感到气短       | <input type="checkbox"/> | <input type="checkbox"/> | <input type="checkbox"/> | <input type="checkbox"/> | <input type="checkbox"/> |
| B12 胸闷            | <input type="checkbox"/> | <input type="checkbox"/> | <input type="checkbox"/> | <input type="checkbox"/> | <input type="checkbox"/> |
| B13 心悸            | <input type="checkbox"/> | <input type="checkbox"/> | <input type="checkbox"/> | <input type="checkbox"/> | <input type="checkbox"/> |
| B14 食欲减退          | <input type="checkbox"/> | <input type="checkbox"/> | <input type="checkbox"/> | <input type="checkbox"/> | <input type="checkbox"/> |
| B15 胃部不适          | <input type="checkbox"/> | <input type="checkbox"/> | <input type="checkbox"/> | <input type="checkbox"/> | <input type="checkbox"/> |
| B16 消化不良          | <input type="checkbox"/> | <input type="checkbox"/> | <input type="checkbox"/> | <input type="checkbox"/> | <input type="checkbox"/> |
| B17 低热或怕冷         | <input type="checkbox"/> | <input type="checkbox"/> | <input type="checkbox"/> | <input type="checkbox"/> | <input type="checkbox"/> |
| B18 入睡有困难         | <input type="checkbox"/> | <input type="checkbox"/> | <input type="checkbox"/> | <input type="checkbox"/> | <input type="checkbox"/> |
| B19 多梦或易被惊醒的情形    | <input type="checkbox"/> | <input type="checkbox"/> | <input type="checkbox"/> | <input type="checkbox"/> | <input type="checkbox"/> |
| B20 记忆力减退         | <input type="checkbox"/> | <input type="checkbox"/> | <input type="checkbox"/> | <input type="checkbox"/> | <input type="checkbox"/> |
| B21 反应能力下降        | <input type="checkbox"/> | <input type="checkbox"/> | <input type="checkbox"/> | <input type="checkbox"/> | <input type="checkbox"/> |
| B22 注意力不集中        | <input type="checkbox"/> | <input type="checkbox"/> | <input type="checkbox"/> | <input type="checkbox"/> | <input type="checkbox"/> |
| B23 没有原因的心烦意乱     | <input type="checkbox"/> | <input type="checkbox"/> | <input type="checkbox"/> | <input type="checkbox"/> | <input type="checkbox"/> |
| B24 紧张、焦虑现象       | <input type="checkbox"/> | <input type="checkbox"/> | <input type="checkbox"/> | <input type="checkbox"/> | <input type="checkbox"/> |

档案编号

B25 在最近一年中，您是否患过感冒？

完全没有  很少有  有  多数有  几乎总是

第六部分 认知功能调查表

Mini-Mental State Examination (MMSE) 简易精神状态检查

| 项目                                                          | 不正确                      | 正确                       |
|-------------------------------------------------------------|--------------------------|--------------------------|
| <b>定向力</b>                                                  |                          |                          |
| 1. 今天是这个月的几号？                                               | <input type="checkbox"/> | <input type="checkbox"/> |
| 2. 今年是哪一年？                                                  | <input type="checkbox"/> | <input type="checkbox"/> |
| 3. 现在是几月份？                                                  | <input type="checkbox"/> | <input type="checkbox"/> |
| 4. 今天是星期几？                                                  | <input type="checkbox"/> | <input type="checkbox"/> |
| 5. 现在是什么季节？                                                 | <input type="checkbox"/> | <input type="checkbox"/> |
| 6. 这家医院的名称是什么？                                              | <input type="checkbox"/> | <input type="checkbox"/> |
| 7. 我们现在是在第几层楼？                                              | <input type="checkbox"/> | <input type="checkbox"/> |
| 8. 我们现在在哪个城市（城镇）？                                           | <input type="checkbox"/> | <input type="checkbox"/> |
| 9. 我们现在在哪个省（或州、或地区、或县、或岛屿）？                                 | <input type="checkbox"/> | <input type="checkbox"/> |
| 10. 我们现在在哪个国家？                                              | <input type="checkbox"/> | <input type="checkbox"/> |
| <b>即刻记忆</b>                                                 |                          |                          |
| 现在我要说三样东西的名称，在我讲完之后，请您重复说一遍，请您记住这三样东西，因为等一下要再问您的：（以第一次回答记分） |                          |                          |
| 11. 回答出“皮球”                                                 | <input type="checkbox"/> | <input type="checkbox"/> |
| 12. 回答出“国旗”                                                 | <input type="checkbox"/> | <input type="checkbox"/> |
| 13. 回答出“树木”                                                 | <input type="checkbox"/> | <input type="checkbox"/> |
| <b>注意力与计算能力</b>                                             |                          |                          |
| <b>100 减 7，连续减 5 次（若错了，但下一个回答是对的，得 1 分）</b>                 |                          |                          |
| 14. 回答出“93”                                                 | <input type="checkbox"/> | <input type="checkbox"/> |
| 15. 回答出“86”                                                 | <input type="checkbox"/> | <input type="checkbox"/> |
| 16. 回答出“79”                                                 | <input type="checkbox"/> | <input type="checkbox"/> |

档案编号

| 项目                                        | 不正确                      | 正确                       |
|-------------------------------------------|--------------------------|--------------------------|
| 17. 回答出“72”                               | <input type="checkbox"/> | <input type="checkbox"/> |
| 18. 回答出“65”                               | <input type="checkbox"/> | <input type="checkbox"/> |
| <b>回忆能力</b>                               |                          |                          |
| 现在请您告诉我，刚才我要您记住的三样东西是什么？                  |                          |                          |
| 19. 回答出“皮球”                               | <input type="checkbox"/> | <input type="checkbox"/> |
| 20. 回答出“国旗”                               | <input type="checkbox"/> | <input type="checkbox"/> |
| 21. 回答出“树木”                               | <input type="checkbox"/> | <input type="checkbox"/> |
| <b>语言能力</b>                               |                          |                          |
| 访问员拿出手表，并问“请问这是什么？”然后再拿出一支铅笔，并询问同样问题      |                          |                          |
| 22. 回答出“手表”                               | <input type="checkbox"/> | <input type="checkbox"/> |
| 23. 回答出“铅笔”                               | <input type="checkbox"/> | <input type="checkbox"/> |
| <b>重复</b>                                 |                          |                          |
| 24. 请您跟我说：“四十四只石狮子”                       | <input type="checkbox"/> | <input type="checkbox"/> |
| 三步命令：给患者一张白纸并告诉他/她，“用您的右手拿起纸，对折并把纸放在地板上”  |                          |                          |
| 25. 患者用右手拿起纸？                             | <input type="checkbox"/> | <input type="checkbox"/> |
| 26. 患者将纸对折？                               | <input type="checkbox"/> | <input type="checkbox"/> |
| 27. 患者把纸放在地板上？                            | <input type="checkbox"/> | <input type="checkbox"/> |
| 阅读：访问员把写有“闭上您的眼睛”大字的卡片交给患者，请患者照着这张卡片所写的去做 |                          |                          |
| 28. 患者闭上了眼睛？                              | <input type="checkbox"/> | <input type="checkbox"/> |
| 书写：请患者写一句完整的、有意义的句子（必须有主语、动词，并有意义）记下句子    |                          |                          |
| 29. 患者写了一个句子？                             | <input type="checkbox"/> | <input type="checkbox"/> |

档案编号

复制

30. 请您按样子画图

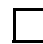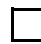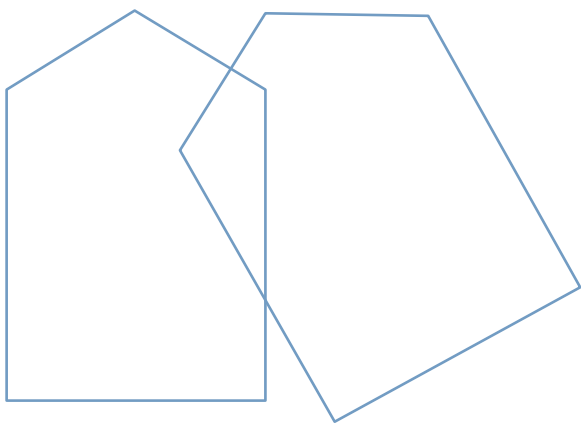

文化程度

文盲

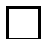

小学

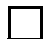

中学程度  
(包括中专)

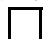

大学程度  
(包括大专)

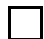

备注 文盲: 未受教育

小学: 受教育年限 $\leq 6$ 年

中学以上: 受教育年限 $> 6$ 年

得分:   分
